# Supplementary material for: Evaluating a clinical ethics committee (CEC) implementation process in an oncological research hospital: protocol for a process evaluation study using normalisation process theory (EvaCEC)
Source: HighWire-hosted journal article supplement (doi:10.1136/bmjopen-2022-067335), 2023-03-01
Supplement: bmjopen-2022-067335supp002_data_supplement.pdf [file bmjopen-2022-067335supp002_data_supplement.pdf]

## Appendix 2

*Guidance of the survey to health care professionals who participated in the training on ethics consultation provided by the Clinical Ethics Committee of the Azienda USL-IRCCS di Reggio Emilia*

This survey is designed to better understand how to apply and integrate complex interventions into care practices. Specifically, this survey asks questions about the implementation process of the Clinical Ethics Committee of the Local health Authority Azienda USL-IRCCS di Reggio Emilia.

The survey has 2 parts. The first part contains a series of more detailed questions about the implemented intervention, through closed-ended questions. The second one, instead, some open-ended questions of in-depth analysis with respect to some aspects of this intervention. Please take the time to decide which answer best fits your experience for each statement and check the appropriate box.

The survey has been elaborated following the model of Finch, T.L., Girling, M., May, C.R., Mair, F.S., Murray, E., Treweek, S., Steen, IN, McColl, E.M., Dickinson, C., Rapley, T. (2015). Nomad: implementation measure based on Normalization Process Theory. [Measurement instrument]. The Italian version is available at: <http://www.normalizationprocess.org>.

| n. | Question                                                                                                 | Agree | Partially Agree | Neutral | Partially disagree | Disagree |
|----|----------------------------------------------------------------------------------------------------------|-------|-----------------|---------|--------------------|----------|
| 1  | I'm able to distinguish CEC from the usual hatreds of working                                            |       |                 |         |                    |          |
| 2  | Staff in this organization have a shared understanding of the purpose of CEC                             |       |                 |         |                    |          |
| 3  | I understand how CEC affects the nature of my work                                                       |       |                 |         |                    |          |
| 4  | I am able to see the potential value of CEC to my work                                                   |       |                 |         |                    |          |
| 5  | There are managers in place to ensure the delivery of the intervention and to engage other practitioners |       |                 |         |                    |          |
| 6  | I believe that participating in the dissemination of the CEC is a legitimate function of my role         |       |                 |         |                    |          |
| 7  | I am willing to work in new ways with my colleagues to use CEC                                           |       |                 |         |                    |          |
| 8  | I will continue to support the use of CEC                                                                |       |                 |         |                    |          |
| 9  | I am able to easily integrate the use of CEC within my work                                              |       |                 |         |                    |          |
| 10 | Turning to CEC disrupts working relationships                                                            |       |                 |         |                    |          |
| 11 | I have confidence in the ability of other practitioners to use CEC                                       |       |                 |         |                    |          |
| 12 | The work is assigned to professionals who possess                                                        |       |                 |         |                    |          |

|    |                                                                                                   |  |  |  |  |  |
|----|---------------------------------------------------------------------------------------------------|--|--|--|--|--|
|    | adequate skills to use CEC                                                                        |  |  |  |  |  |
| 13 | Sufficient training has been provided to enable staff to implement CEC                            |  |  |  |  |  |
| 14 | Sufficient resources are available to support the delivery of CEC                                 |  |  |  |  |  |
| 15 | Management adequately supports the delivery of the ECC                                            |  |  |  |  |  |
| 16 | I am aware of scientific reports on the effects of CEC                                            |  |  |  |  |  |
| 17 | Staff agree that using CEC is fruitful.                                                           |  |  |  |  |  |
| 18 | I appreciate the effects the delivery of CEC has had on my work                                   |  |  |  |  |  |
| 19 | It is possible to use the feedback collected on the CEC to improve the tool in the future         |  |  |  |  |  |
| 20 | I can modify the way I work with the CEC                                                          |  |  |  |  |  |
|    |                                                                                                   |  |  |  |  |  |
| A  | In what ways can the CEC be improved??                                                            |  |  |  |  |  |
| B  | What aspects would you like CEC to address in the future?                                         |  |  |  |  |  |
| C  | What has CEC brought to the health care facility where you work?                                  |  |  |  |  |  |
| D  | Do you have additional opinions and/or suggestions with respect to the way this service operates? |  |  |  |  |  |
